# Supplementary material for: Impact of climatic conditions projected at the World Cup in Qatar 2022 on repeated maximal efforts in soccer players
Source: PeerJ. 2021 Dec 22;9:e12658. doi: 10.7717/peerj.12658 (PMC8710061; doi:10.7717/peerj.12658)
Supplement: Supplemental Information 1 — The following mechanical parameters were recorded in the study: Pmax, tmax, TW, Fi and RPE [file peerj-09-12658-s001.xlsx]

## Sheet: Wyniki
Lp	Surname and Name	Conditions	PeakP2(W)	PeakP4(W)	PeakP6(W)	PeakP8(W)	PeakP10(W)	TotalWork2(J)	TotalWork4(J)	TotalWork6(J)	TotalWork8(J)	TotalWork10(J)	TtoPP2(sec)	TtoPP4(sec)	TtoPP6(sec)	TtoPP8(sec)	TtoPP10(sec)	RateofFatigue2(%)	RateofFatigue4(%)	RateofFatigue6(%)	RateofFatigue8(%)	RateofFatigue10(%)	RPE2	RPE4	RPE6	RPE8	RPE10
1		Thermoneutral	1520.56	1701.69	1896.89	1989.45	1877.03	7178.15	7899.31	7889.52	8299.51	7955.39	1.709	1.47202	0.854004	0.825989	0.971985	31.6142	34.8129	56.1066	56.0278	44.7529	3	4	4	4	5
2		Thermoneutral	1245.09	1328.36	1606.22	1497.19	1352.6	6276.34	6238.74	6741.84	6533.14	6348.56	1.901	1.258	1.18396	1.32501	1.26202	27.7005	34.0358	45.5617	44.2235	34.3154	2	3	5	5	6
3		Thermoneutral	1452.72	1437.89	1261.26	1610.9	1477.34	6614.76	6806.94	5942.07	6786.38	6733.61	1.12599	1.259	2.02899	1.13702	1.68201	37.6591	37.3635	22.6426	45.7124	35.6845	3	3	4	4	5
4		Thermoneutral	1287.68	1291.08	1467.07	1378.03	1476.56	6350.36	6414.48	6336.11	6396.63	6410.09	1.34499	1.29999	0.660034	1.46802	1.20801	26.4939	29.217	44.9167	36.6302	45.2883	1	2	4	4	5
5		Thermoneutral	1796.04	1790.32	1577.56	1648.8	1940.78	7453.22	6892.77	6539.79	6416.29	6101.37	1.13899	0.856995	1.409	1.38	0.715027	49.8866	66.1625	52.3752	53.5671	76.2384	3	6	7	7	8
6		Thermoneutral	1569.17	1538.27	1632.59	1762.18	1651.47	6979.6	6836.94	6781.8	6355.7	6815.29	1.341	1.46701	1.42102	0.55603	1.25702	42.1793	39.8111	46.8811	74.3306	50.1544	3	5	6	7	8
7		Thermoneutral	1632.91	1692.41	1463.76	1604.87	1591.32	6726.69	6785.73	6592.7	6609.53	6568.77	1.47499	0.597992	1.185	0.885986	1.01801	54.5173	50.2462	40.4613	49.9346	50.3615	2	3	4	5	6
8		Thermoneutral	1414.72	1413	1418.83	1574.41	1482.2	6610.67	6521.72	6696.5	6728.36	6723.74	1.325	1.491	1.60199	1.06201	1.83203	35.9611	36.8002	37.4858	44.4356	38.0721	5	6	6	7	7
9		Thermoneutral	1499.53	1391.45	1021.35	1187.24	1187.24	6542.68	5978.33	5117.45	5390.99	5390.99	0.733994	1.047	1.224	1.24301	1.24301	45.3434	43.317	24.4821	35.2545	35.2545	4	5	6	7	7
10		Thermoneutral	1206.2	1444.39	1084.67	1459.9	1373.85	5781.61	5983.18	5196	5732.73	5725.98	1.673	1.02701	2.41602	0.901978	1.02496	28.8828	48.4682	26.5456	54.6218	48.3249	4	5	6	7	7
11		Thermoneutral	1813.16	2006.43	1872.91	1870.97	1862.65	7701.2	7230.83	7274.75	7090.24	7353.67	0.899002	0.476013	1.00104	1.10999	0.810974	49.5493	72.2523	72.3799	61.7074	54.5778	2	3	4	6	8
12		Thermoneutral	1987.73	1864.84	1761.37	1828.69	2055.46	7992.13	7720.44	7791.08	7455.32	7968.03	1.10399	1.05801	1.60999	1.125	1.22797	57.7936	60.695	38.3259	73.319	84.6722	3	5	7	8	9
13		Thermoneutral	1605.29	1796.46	1842.45	1690.07	1670.22	7309.66	7966.78	7822.71	7631.52	7612.87	1.14101	1.022	1.12897	0.85199	1.58301	34.8792	39.808	50.8166	40.2332	37.6542	3	5	6	7	8
14		Thermoneutral	1624.66	1712.02	1713.54	1732.16	1735.15	7753.93	8186.39	8239.25	8300.73	8566.87	1.51999	1.83899	1.98096	1.51898	2.08197	46.8663	51.9782	33.1928	35.909	30.9999	2	2	3	3	3
15		Thermoneutral	1467.87	1389.2	1367.5	1359.25	1610.44	6080.23	6336.34	6519.72	6198.3	6420.21	0.882996	1.46698	1.40601	1.51599	0.607971	58.2862	40.3015	37.0556	36.7584	57.0183	3	4	6	7	7
16		Thermoneutral	1774.02	1665.88	1762.86	1782.15	1626.51	8122.67	8084.41	7892.59	7943.39	7453.78	1.63901	1.59302	1.573	1.495	1.84601	35.6917	28.9625	46.9077	37.3583	30.9221	2	2	3	4	4
17		Thermoneutral	1540.91	1551.8	1640.93	1603.06	1720.76	6932.94	6835.61	6655.09	6734.28	6932.21	1.52701	1.65698	1.013	1.34399	0.807983	45.8619	41.4088	53.84	47.3458	52.3095	2	2	4	4	5
18		Thermoneutral																					2	2	3	4	5
19		Thermoneutral	1637.78	1533.84	1504.84	1385.8	1377.19	7008.29	6756.36	6563.51	6346.96	6407.03	1.099	0.668976	1.35901	1.64502	1.99799	44.3584	42.6283	43.1371	37.4295	30.6117	1	2	4	4	5
20		Thermoneutral	1561.34	1567.13	1474.13	1568.1	1691.42	7231.13	7365.45	7102.47	7557.95	7861.93	1.90599	1.67502	2.41699	1.60803	1.31097	39.4256	30.0521	27.2208	31.1778	35.9639	1	2	3	3	4
21		Thermoneutral	1700.22	1723.98	1763.49	1726.25	1712.13	7112.04	6660.1	6825.39	6671.46	6852.82	1.07201	0.635986	1.00604	1.37305	1.41003	46.433	64.6249	56.5182	64.3201	56.5522	3	4	5	5	6
22		Thermoneutral	1781.71	1708.07	1836.83	1831.51	1845.32	7663.97	7545.06	7432.61	7464.98	7313.18	1.082	1.06299	1.026	0.998047	1.16101	43.9948	42.4615	57.3369	52.8078	55.9781	3	4	5	5	6
1		Qatar 2022	2122.8	1896.81	2027.55	1909.53	2148.73	8146.61	8280.6	8584.55	8016.94	8091.54	0.927994	1.23798	1.39905	0.775024	0.624023	71.7444	48.4494	52.5621	56.4472	57.6832	4	5	6	7	9
2		Qatar 2022	1595.86	1527.81	1427.67	1331.46	1482.62	6693.68	6548.61	6440.7	6477.14	6606.91	0.867004	1.008	1.12604	1.24597	1	46.509	45.4194	37.2568	32.0249	41.05	3	3	4	5	6
3		Qatar 2022	1393.19	1679.44	1499.62	1701.68	1739.05	6677.8	7246.12	6962.02	6917.7	7066.11	1.713	1.064	1.42603	0.598022	0.843018	32.5974	44.5649	35.889	49.6592	46.7829	3	3	4	6	7
4		Qatar 2022	1671.42	1473.3	1737.83	1682.68	1665.26	6760.06	5758.12	6113.38	6445.9	6544.91	0.863998	1.24197	0.960999	0.849976	1.20599	55.6327	73.3704	71.509	55.9761	54.8309	1	3	4	5	5
5		Qatar 2022	1839.71	2131.5	1783.95	1716.29	1785.33	7654.83	7280.21	7131.71	6743.47	6642.97	0.905991	0.64801	1.005	0.786011	0.908997	46.051	62.6175	53.1274	75.1126	81.3901	4	6	8	9	10
6		Qatar 2022	1673.87	1649.36	1825.04	1745	1561.1	7430.26	7198.37	6776.68	6938.5	6761.55	1.332	1.46201	1.01001	1.51801	1.29895	43.7228	48.4417	70.2903	65.3597	48.0868	3	4	5	7	9
7		Qatar 2022																					3	4	5	7
8		Qatar 2022	1618.88	1631.51	1626.98	1748.26	1709.36	6926.27	7043.74	6960.68	6916.78	7080.33	0.921005	1.457	1.01404	1.18396	1.02197	52.1692	43.0535	43.0056	59.9833	49.1385	5	6	6	6	6
9		Qatar 2022	1343.65	1299.11	1196.74	1216.63	1406.84	5635.97	5788.11	5259.74	5080.49	4445.84	0.703003	1.47699	1.24902	1.19702	0.493958	52.2887	41.2072	47.0747	63.1054	100	2	3	4	5	6
10		Qatar 2022	1387.3	1455.88	1262.97	1250.3	1377.33	5959.19	5173.71	5155.05	5117.01	5458.9	1.07899	0.996002	1.13397	1.09204	0.822998	47.798	78.0752	57.6813	48.6458	53.4846	2	3	5	5	6
11		Qatar 2022	1886.11	1898.58	1945.72	1949.59	1859.09	7768.9	7088.83	7972.47	7755.62	7798.71	1.10699	1.24301	1.22302	1.17303	1.08502	52.7224	86.3706	52.8984	53.5088	49.366	2	4	5	6	8
12		Qatar 2022	1907.16	2093.12	2004.04			8259.42	7429.04	7414.58			1.5	0.658997	1.01898			52.3342	81.8335	72.0777			3	5	6
13		Qatar 2022	1891.08	1727.21	1643.85	1812.61	1803.38	8177.12	8059.06	7795.54	7969.12	8103.71	1.28	1.47101	1.461	1.21301	1.19604	56.0529	45.6162	43.7374	40.114	40.7824	3	5	6	7	8
14		Qatar 2022	2042.74	1997.54	2081.46	1922.17	1777.45	8718.03	8748.29	8942.12	8807.22	8311.29	1.067	0.851013	1.22406	0.983032	1.24603	49.0264	46.1446	51.3053	39.4603	33.4252	1	2	2	3	3
15		Qatar 2022	1529.07	1479.8	1479.8			6485.46	6705.68	6705.68			1.084	1.621	1.621			43.5609	40.1465	40.1465			2	4	6
16		Qatar 2022	1946.2	1873.26	2017.89	1769.76	1776.86	8489.15	8403.76	8405.51	8078.27	8052.59	1.325	1.241	1.19397	1.34198	1.89404	55.039	44.2803	46.8273	43.0527	35.942	1	3	4	5	6
17		Qatar 2022	1724.45	1728.64	1876.17	1697.45	1725.76	6954.48	6648.52	6435.74	6639	6831.29	1.08101	1.00101	0.602966	0.521973	1.01898	52.8315	55.9701	60.0221	55.4912	61.2508	1	3	4	5	7
18		Qatar 2022	1850.66	1817.78	1641.33	1673.82	1576.61	7531.02	7575	7580.3	7350.65	7061.8	0.514999	1.22202	1.40997	1.09003	1.04102	54.3871	57.1153	42.8717	48.6262	50.3038	2	3	3	5	6
19		Qatar 2022	1654.33	1510.94	1525.74	1500.83	1526.78	6480.16	6755.79	6421.06	6459.09	6480.35	1.09601	1.44598	1.216	1.29803	1.04895	71.4558	41.4036	42.8062	47.4298	46.4653	1	2	4	5	6
20		Qatar 2022	1639	1654.55	1775.75	1629.05	1668.83	7772.3	7730.53	8144.83	7623.24	7815.46	1.541	1.862	1.59601	1.74799	1.46899	32.284	34.1004	42.2805	35.4257	40.1074	2	3	4	5	6
21		Qatar 2022	1682.24	1629.5	1589.85	1635.02	1722.78	6960.73	6571.37	6235.06	5997.49	6136.78	0.951004	0.877014	1.23297	1.013	1.15002	48.1503	54.3949	50.2904	63.0883	66.5785	5	6	6	6	7
22		Qatar 2022	1926.43	1831.92	1701.85	1900.18	1596.41	7661.22	7735.72	7762.7	7392.88	7281.63	0.714996	0.838989	0.817993	0.780029	1.33502	50.9024	48.9657	43.147	72.7731	33.4746	4	5	6	7	7
